# Supplementary material for: Ship-in-bottle synthesis of the mixed-layered compounds of clay silicate/zirconium phosphate
Source: Royal Society of Chemistry journal article supplement (doi:10.1039/c4dt01126k), 2014-01-01
Supplement: c4dt01126k2.pdf [file c4dt01126k2.pdf]

**Supplementary Material for**  
**Ship-in-bottle synthesis of the mixed-layer compounds of clay**  
**silicate/zirconium phosphate**

Hiroshi Kawagoe, Naoya Imo-oka, Hiroyasu Shinohara, and  
Shoji Yamanaka\*

Department of Applied Chemistry, Graduate School of Engineering, Hiroshima  
University, Higashi-Hiroshima 739-8527, Japan

\*E-mail: [syamana@hiroshima-u.ac.jp](mailto:syamana@hiroshima-u.ac.jp)

CIF file for the mixed-layer compound montmorillonite/Zr(C<sub>6</sub>H<sub>5</sub>OPO<sub>3</sub>)<sub>2</sub>

The fractional coordinates of all of the atoms shown in Fig. 5 were estimated on the basis of the structures of montmorillonite (ref. 20) and  $\alpha$ -zirconium phosphate (ref. 21). The following cif file is attached as supplementary material for the reproduction of the figure and the calculation of the XRD powder pattern. Since this is not the result of crystal structure analysis, the file name has an extension of .txt to avoid confusion. The file can be used as cif file by changing the extension to .cif.

Montmorillonite\_Zr(C<sub>6</sub>H<sub>5</sub>OPO<sub>3</sub>)<sub>2</sub>.txt
